# Supplementary material
Source: PubMed Central journal article supplement (PMC4912355)

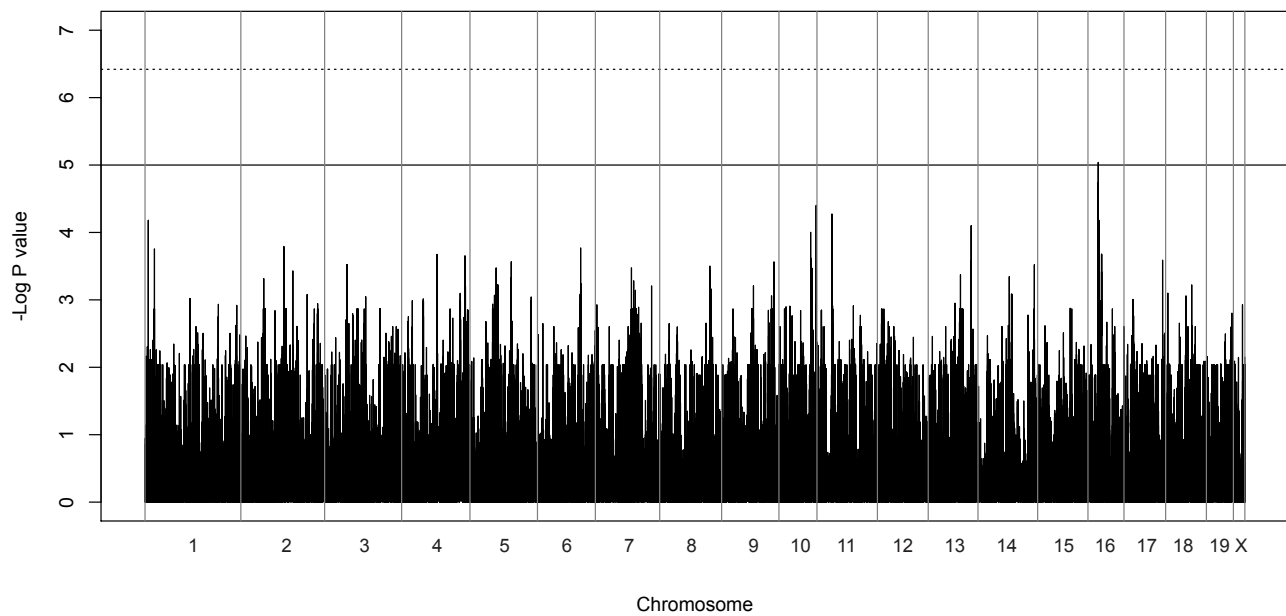

**Figure S1. Genome-wide association mapping using EMMA.**

Supplement: NIHMS3924-supplement-2.pdf [file NIHMS3924-supplement-2.pdf]

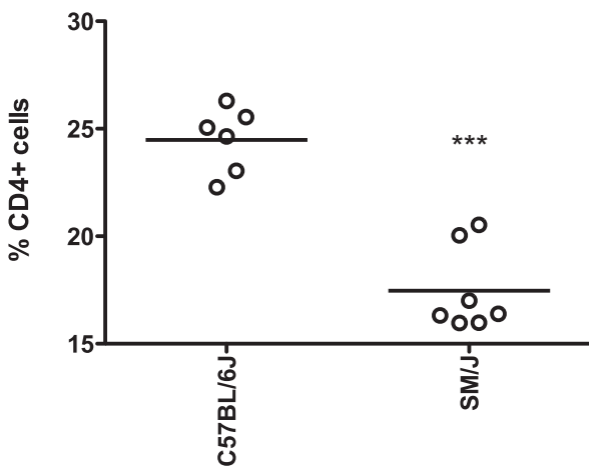

**Figure S2. Percentage of CD4+ cells in the spleen of C57BL/6J and SM/J mice.**

Supplement: NIHMS3924-supplement-4.pdf [file NIHMS3924-supplement-4.pdf]
